# Supplementary material for: Lab on skin: real-time metabolite monitoring with polyphenol film based subdermal wearable patches
Source: Royal Society of Chemistry journal article supplement (doi:10.1039/d4lc00073k), 2024-01-01
Supplement: d4lc00073k1.pdf [file d4lc00073k1.pdf]

## Supplementary Information

### Lab on Skin: Real-time Metabolite Monitoring with Polyphenol film based Subdermal Wearable Patches

Georgeta Vulpe <sup>#a</sup>, Guoyi Liu <sup>#a,b</sup>, Sam Oakley <sup>#a</sup>, Guanghao Yang <sup>a,b</sup>, Arjun Ajith Mohan <sup>\*a</sup>, Mark  
Waldron <sup>a</sup>, Sanjiv Sharma <sup>\*a</sup>

<sup>a</sup> Faculty of Science and Engineering, Swansea University, Fabian Way, Bay Campus, Swansea SA1  
8EN, UK

<sup>b</sup> Key Laboratory of Optoelectronic Technology & Systems (Chongqing University), Chongqing  
400044, China

Email: [arjun.ajithmohan@swansea.ac.uk](mailto:arjun.ajithmohan@swansea.ac.uk); [sanjiv.sharma@swansea.ac.uk](mailto:sanjiv.sharma@swansea.ac.uk)

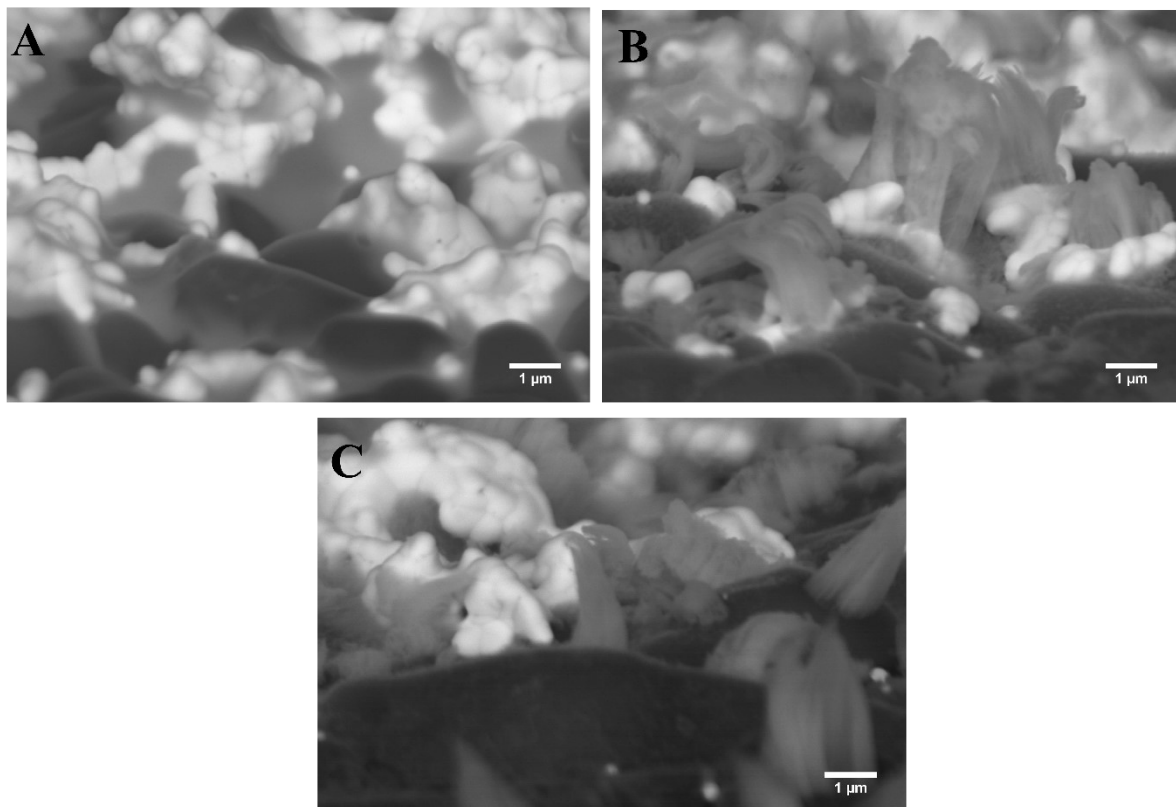

**Figure S1:** SEM images of (A) Pt SPE, (B) Pt SPE modified with polyphenol@GOx, and (C) Pt SPE modified with polyphenol@LOx

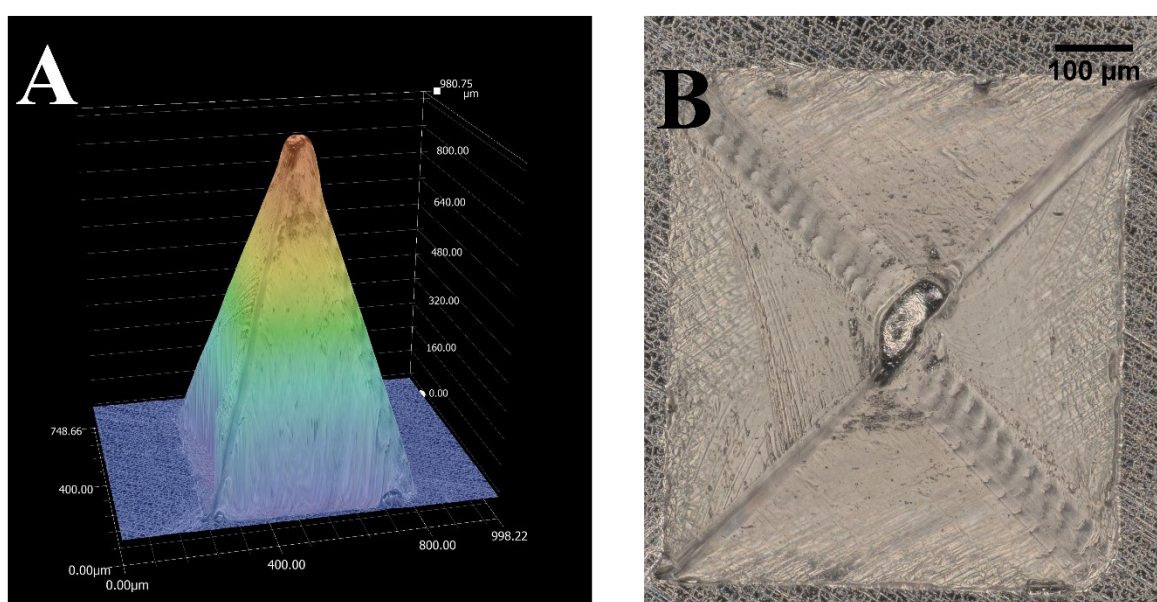

**Figure S2:** Microscopy images of (A) side view and (B) top view of single pyramid of the patch

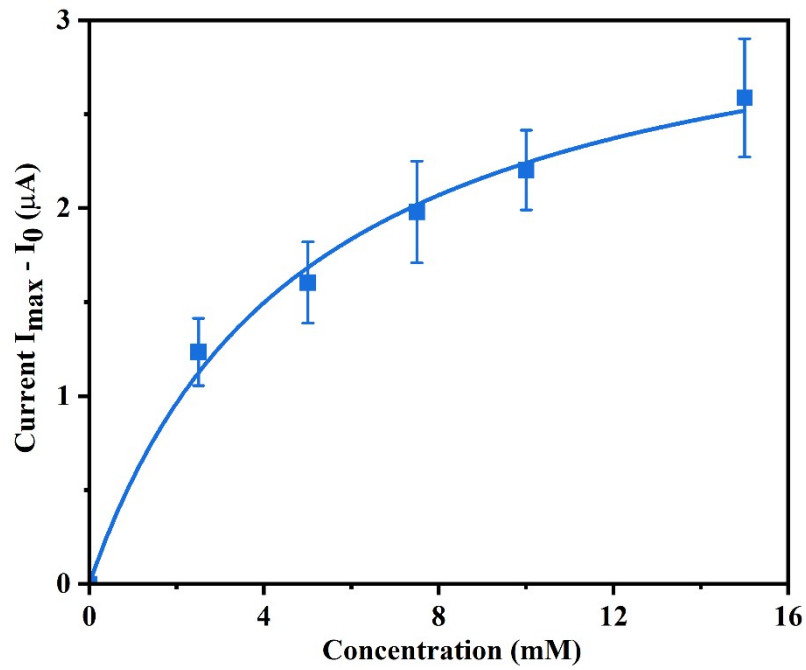

**Figure S3:** *In vitro* studies carried out on polyphenol GOx modified MN patches for detection of different concentrations of glucose.

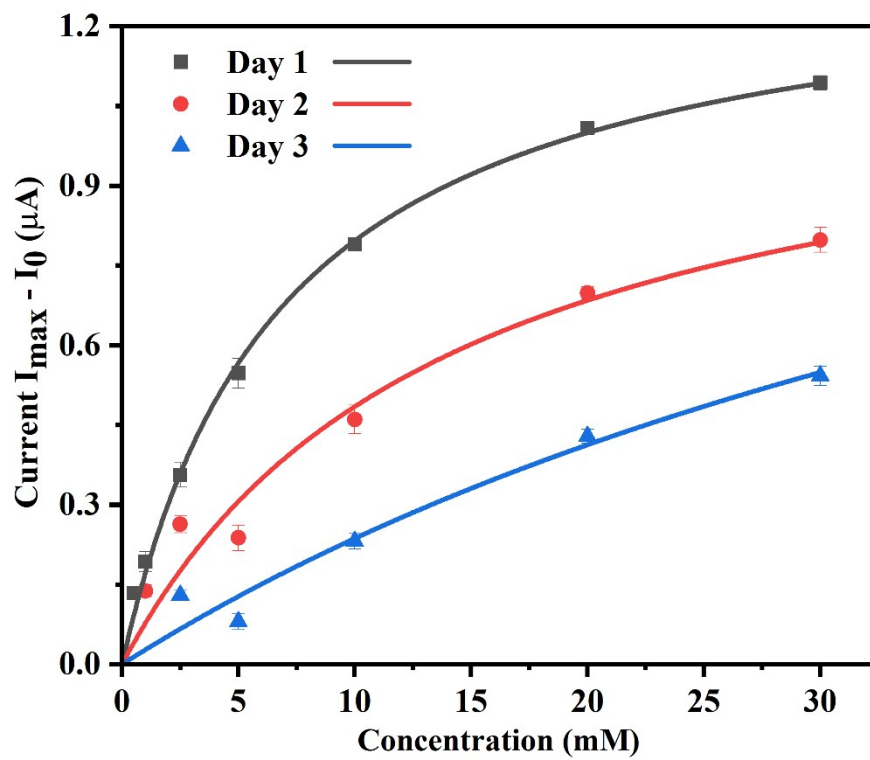

**Figure S4:** *In vitro* biofouling studies carried out on Pt SPEs by immersing them in artificial ISF containing bovine serum albumin.

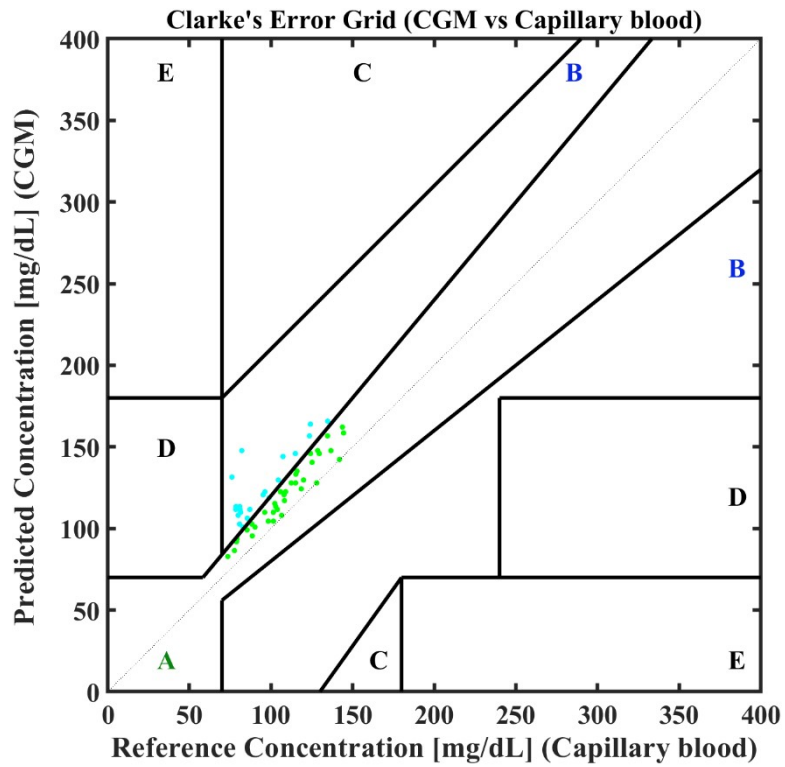

**Figure S5:** CGE showing the predicted concentration from the CGM in comparison to reference concentrations from capillary blood measurements.
